# Supplementary material for: Structure–activity relationship of anticancer and antiplasmodial gold bis(dithiolene) complexes
Source: Royal Society of Chemistry journal article supplement (doi:10.1039/d4dt01458h), 2024-01-01
Supplement: d4dt01458h1.pdf [file d4dt01458h1.pdf]

## Supporting Information

### Structure-activity relationship of anticancer and antiplasmodial gold bis(dithiolene) complexes

Constantin Vitré<sup>1</sup>, Yann Le Gal<sup>1</sup>, Antoine Vacher<sup>1</sup>, Thierry Roisnel<sup>1</sup>, Dominique Lorcy<sup>1\*</sup>, Sofia Santana<sup>2</sup>, Miguel Prudêncio<sup>2</sup>, Teresa Pinheiro<sup>3,4</sup>, Fernanda Marques<sup>4,5\*</sup>

#### Table of content

|                                                                                                            |            |
|------------------------------------------------------------------------------------------------------------|------------|
| <b>Fig. S1:</b> CVs of AuN-PEG and AuN-C <sub>8</sub> at different scan rate                               | <b>p2</b>  |
| <b>Fig. S2:</b> CVs of AuS-EtOH at different scan rate                                                     | <b>p2</b>  |
| <b>Fig. S3 and S4:</b> <sup>1</sup> H NMR and <sup>13</sup> C NMR of <b>2a</b>                             | <b>p3</b>  |
| <b>Fig. S5 and S6:</b> <sup>1</sup> H NMR and <sup>13</sup> C NMR of <b>2b</b>                             | <b>p4</b>  |
| <b>Fig. S7 and S8:</b> <sup>1</sup> H NMR and <sup>13</sup> C NMR of <b>3</b>                              | <b>p5</b>  |
| <b>Fig. S9 and S10:</b> <sup>1</sup> H NMR and <sup>13</sup> C NMR of <b>4</b>                             | <b>p6</b>  |
| <b>Fig. S11 and S12:</b> <sup>1</sup> H NMR and <sup>13</sup> C NMR of <b>6a</b>                           | <b>p7</b>  |
| <b>Fig. S13 and S14:</b> <sup>1</sup> H NMR and <sup>13</sup> C NMR of <b>6b</b>                           | <b>p8</b>  |
| <b>Fig. S15 and S16:</b> <sup>1</sup> H NMR and <sup>13</sup> C NMR of AuN-C <sub>8</sub>                  | <b>p9</b>  |
| <b>Fig. S17 and S18:</b> <sup>1</sup> H NMR and <sup>13</sup> C NMR of AuN-PEG                             | <b>p10</b> |
| <b>Fig. S19 and S20:</b> <sup>1</sup> H NMR and <sup>13</sup> C NMR of AuS-C <sub>12</sub>                 | <b>p11</b> |
| <b>Fig. S21 and S22:</b> <sup>1</sup> H NMR and <sup>13</sup> C NMR of AuS-PEG                             | <b>p12</b> |
| <b>Figures S23-S32:</b> HRMS spectra                                                                       | <b>p13</b> |
| <b>Table S1:</b> Redox potentials (E in V vs. SCE)                                                         | <b>p18</b> |
| <b>Fig. S33:</b> <sup>1</sup> NMR spectra of AuN-Et in DMSO solution at T <sub>0</sub> and T <sub>66</sub> | <b>p19</b> |

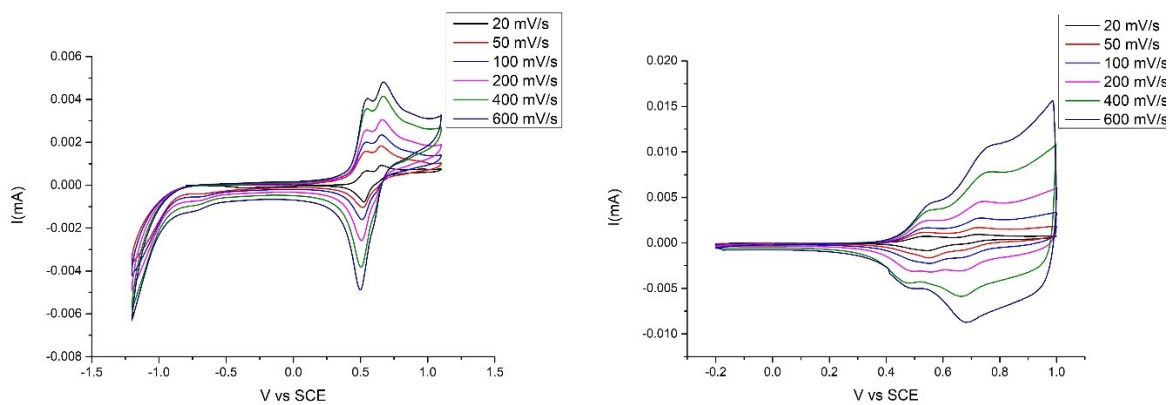

**Fig. S1 :** CVs of AuN-PEG (left) and AuN-C<sub>8</sub> (right) in 0.1M [CH<sub>2</sub>Cl<sub>2</sub>][Bu<sub>4</sub>NPF<sub>6</sub>] at different scan rate from 20 to 600 mV s<sup>-1</sup>

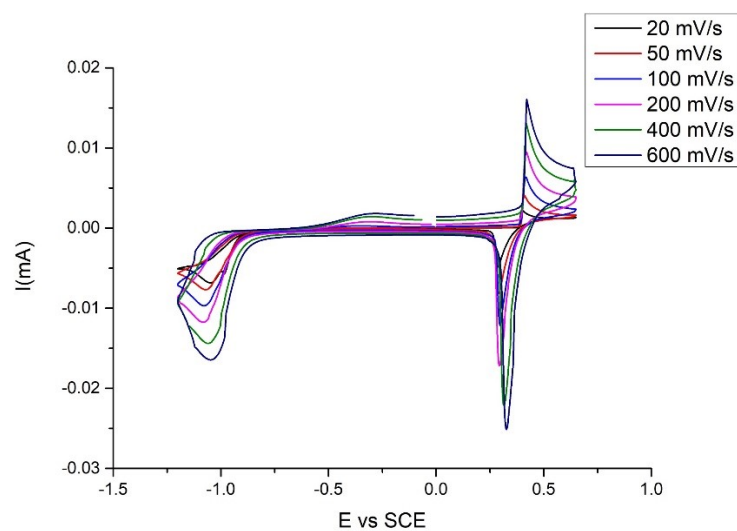

**Fig. S2 :** CVs of AuS-EtOH in 0.1M [CH<sub>2</sub>Cl<sub>2</sub>][Bu<sub>4</sub>NPF<sub>6</sub>] at different scan rate from 20 to 600 mV s<sup>-1</sup>

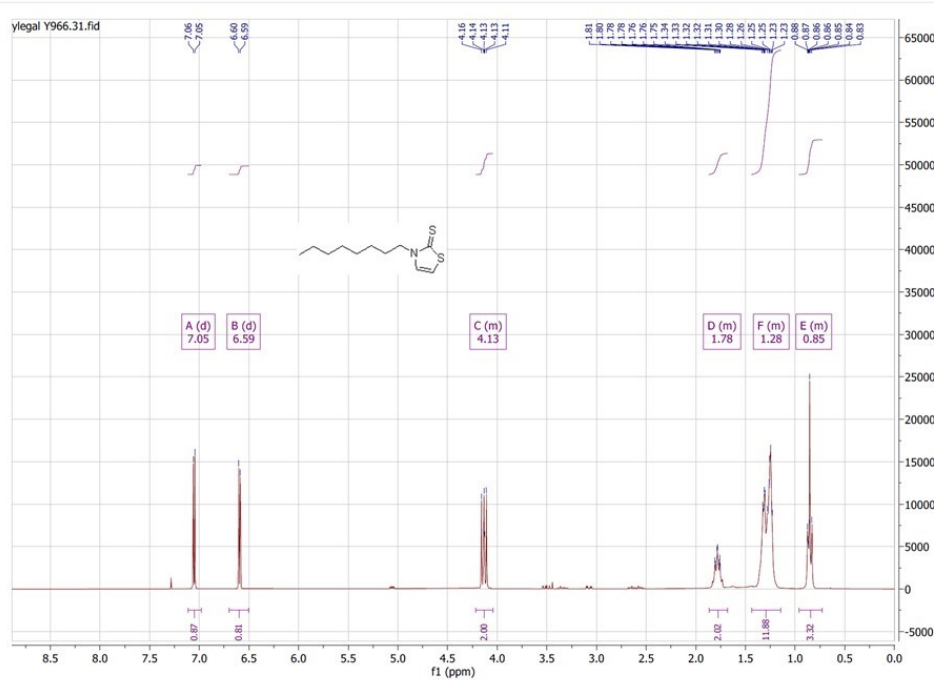

Fig. S3:  $^1\text{H}$  NMR of 2a

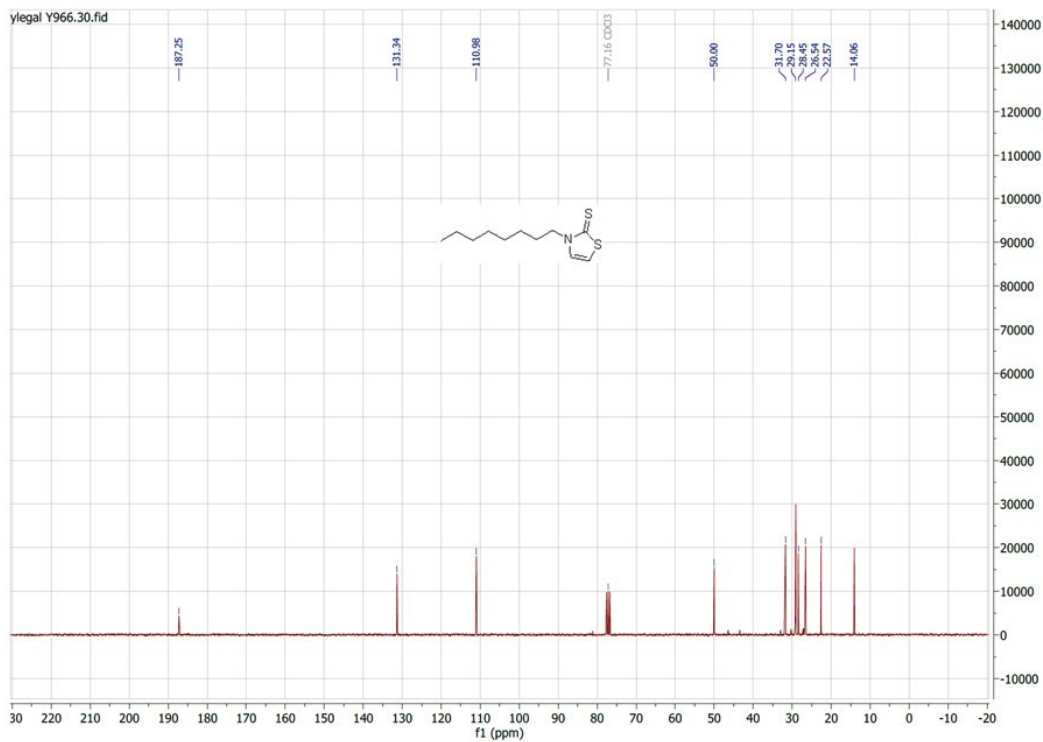

Fig. S4:  $^{13}\text{C}$  NMR of 2a

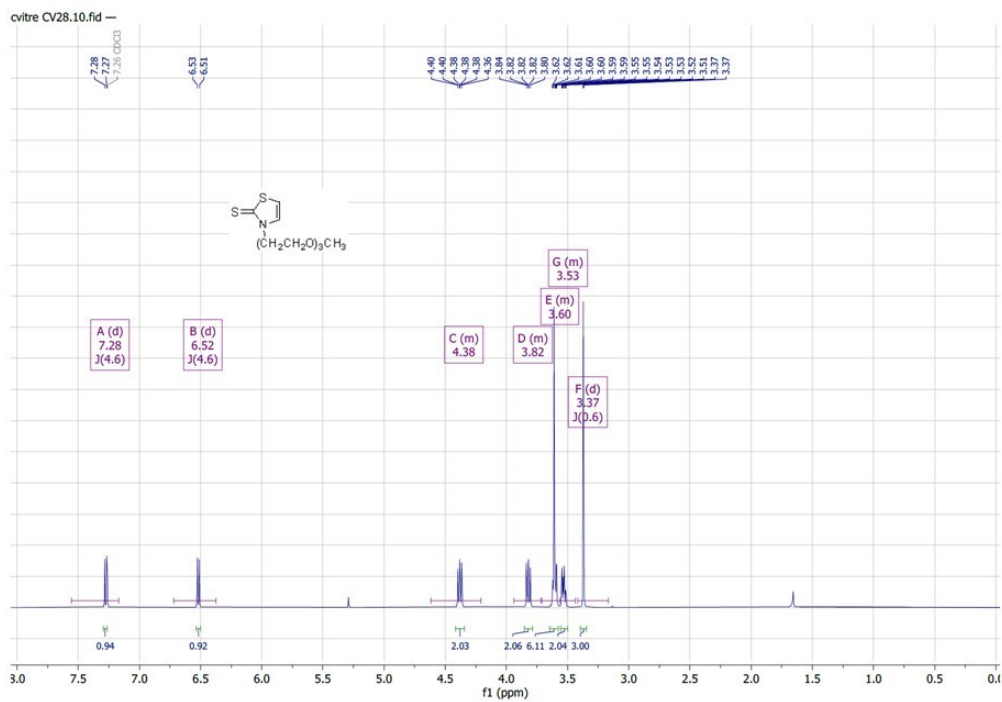

Fig. S5:  $^1\text{H}$  NMR of 2b

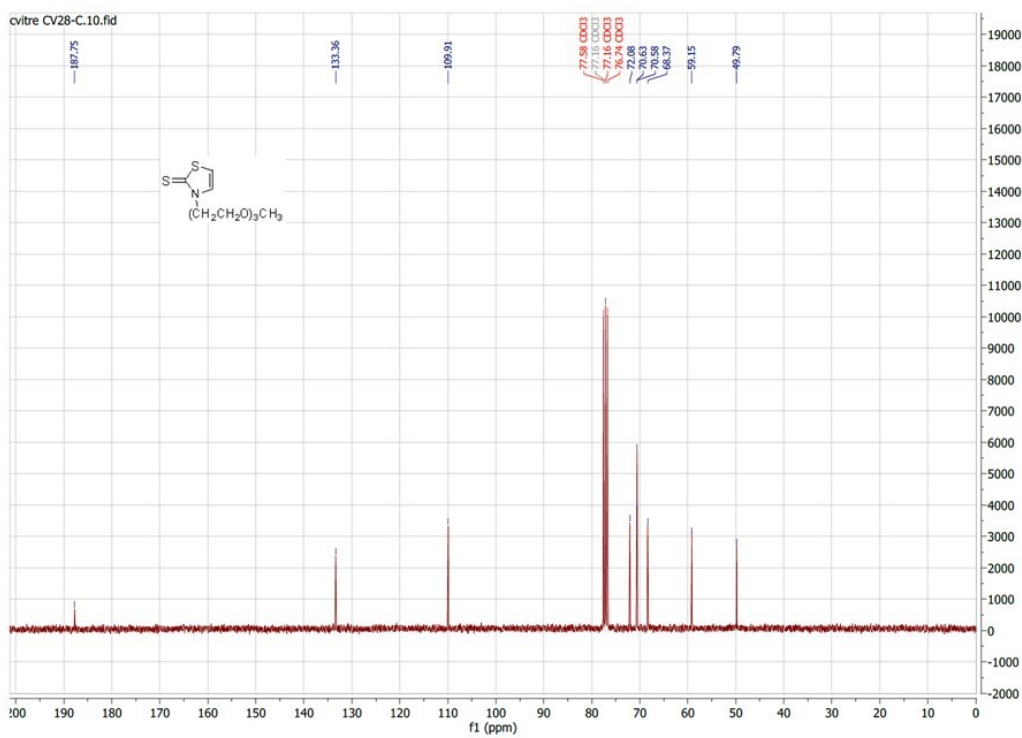

Fig. S6:  $^{13}\text{C}$  NMR of 2b

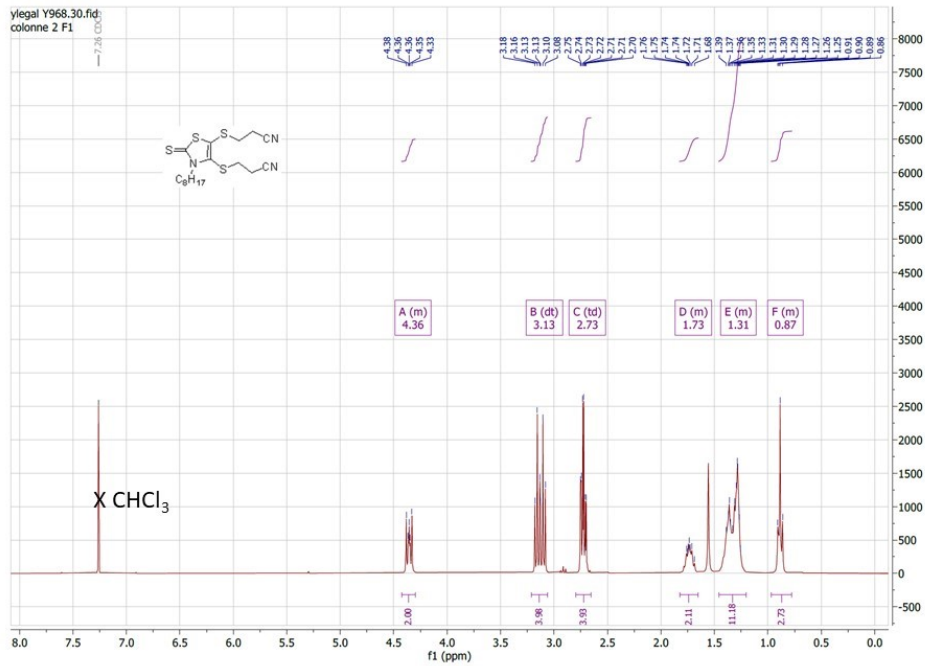

Fig. S7: <sup>1</sup>H NMR of 3

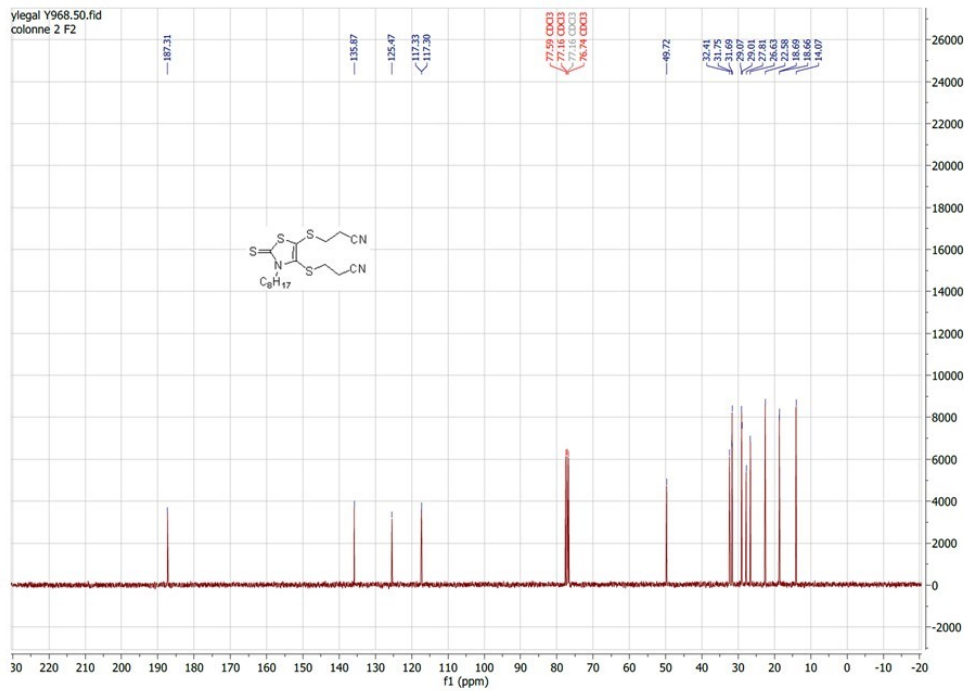

Fig. S8: <sup>13</sup>C NMR of 3

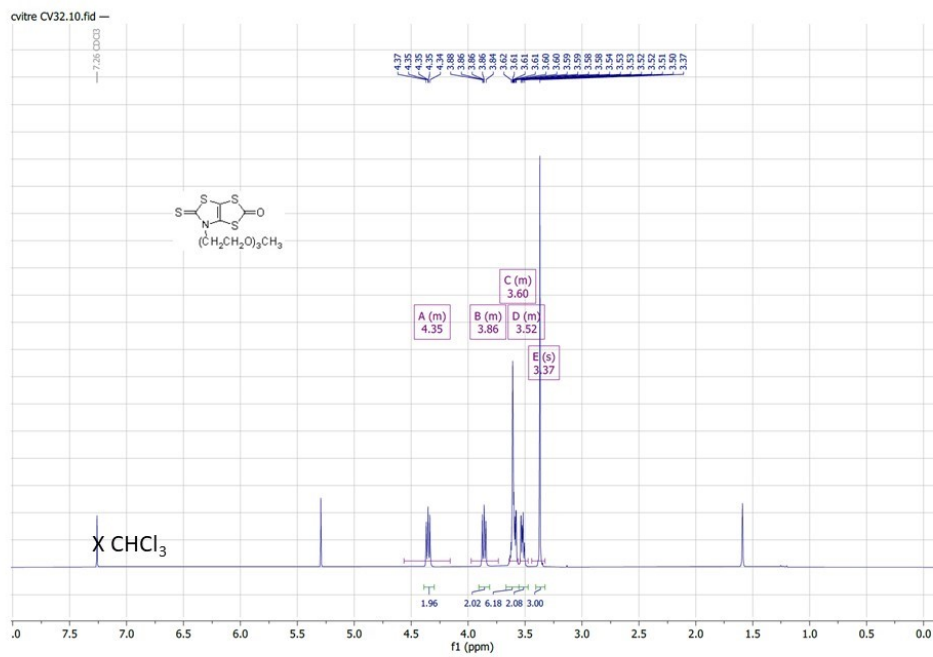

Fig. S9: <sup>1</sup>H NMR of 4

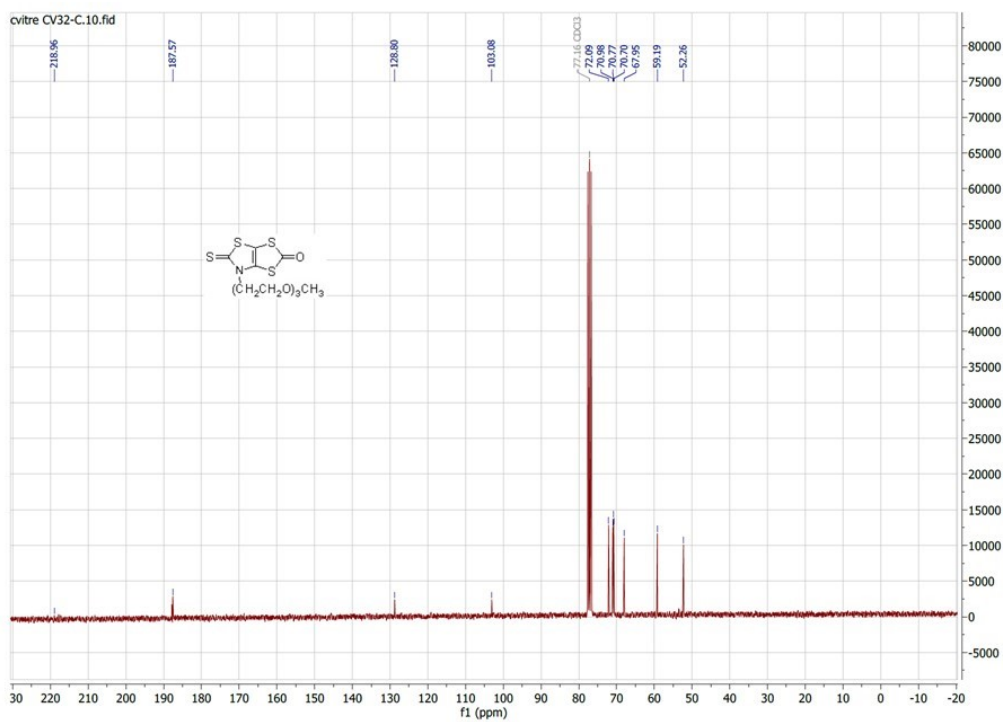

Fig. S10: <sup>13</sup>C NMR of 4

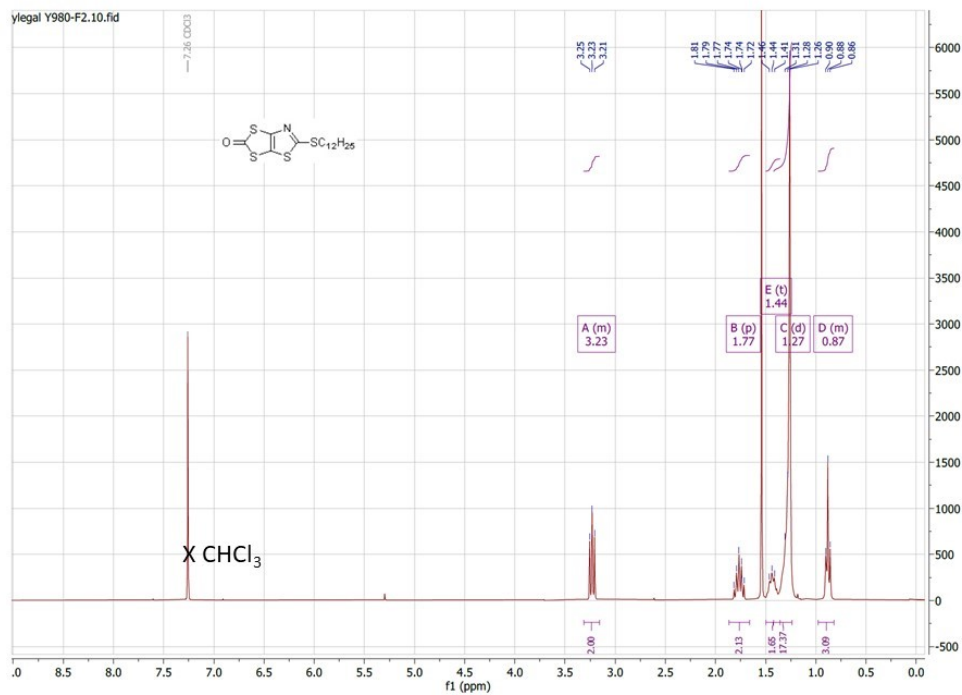

Fig. S11: <sup>1</sup>H NMR of 6a

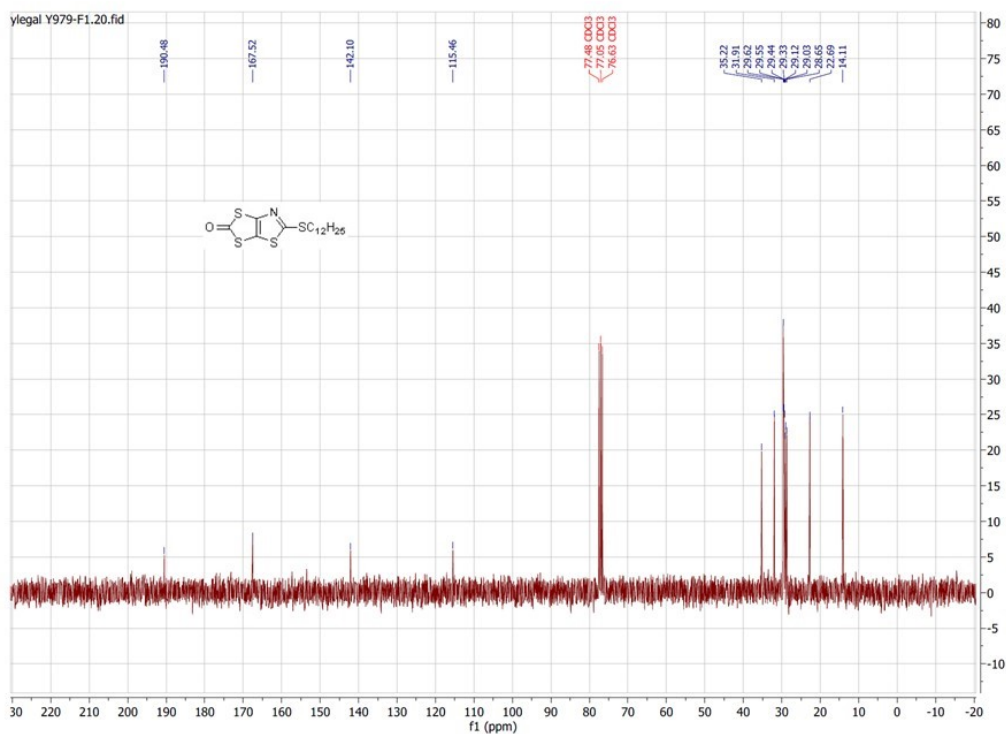

Fig. S12: <sup>13</sup>C NMR of 6a

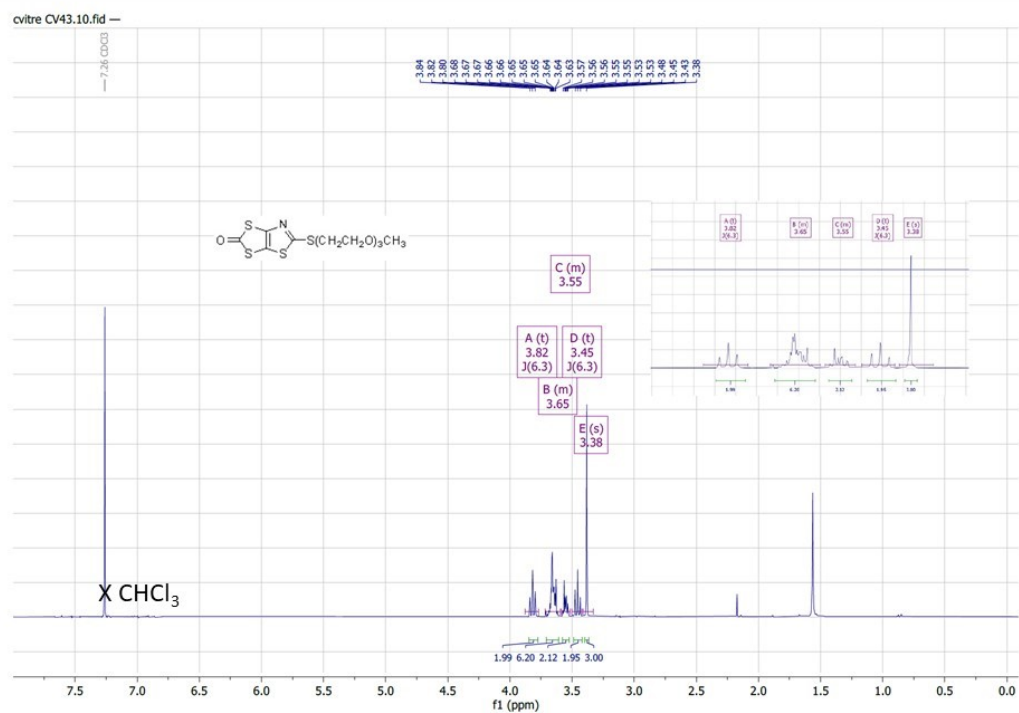

Fig. S13: <sup>1</sup>H NMR of 6b

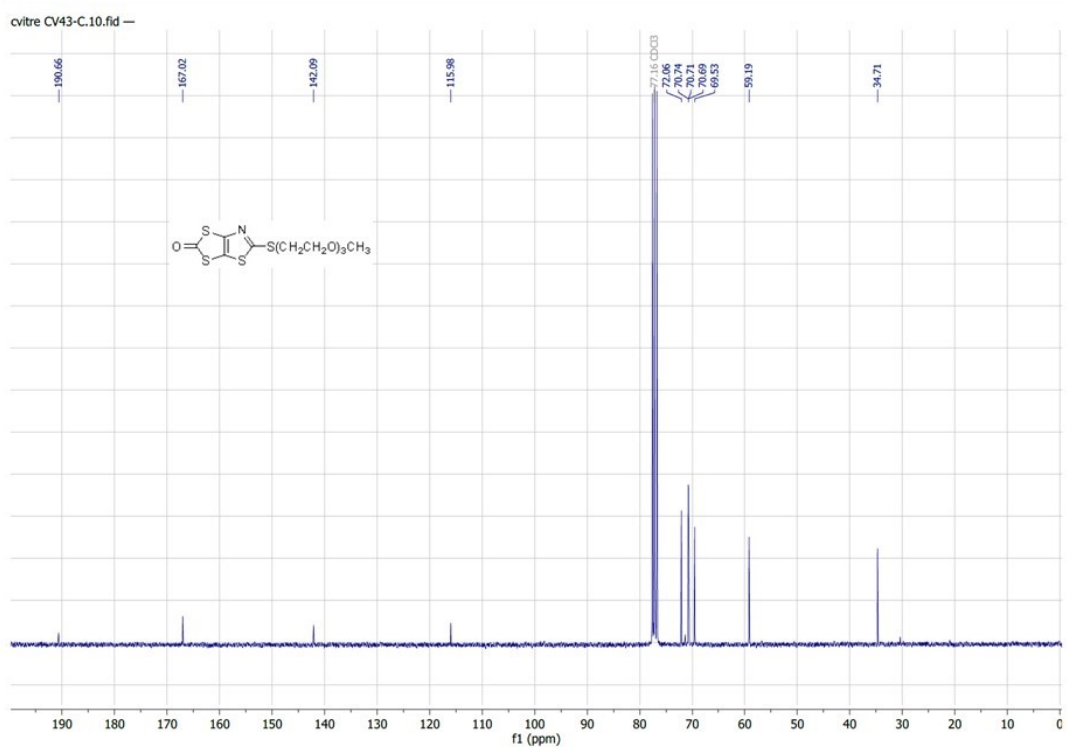

Fig. S14: <sup>13</sup>C NMR of 6b



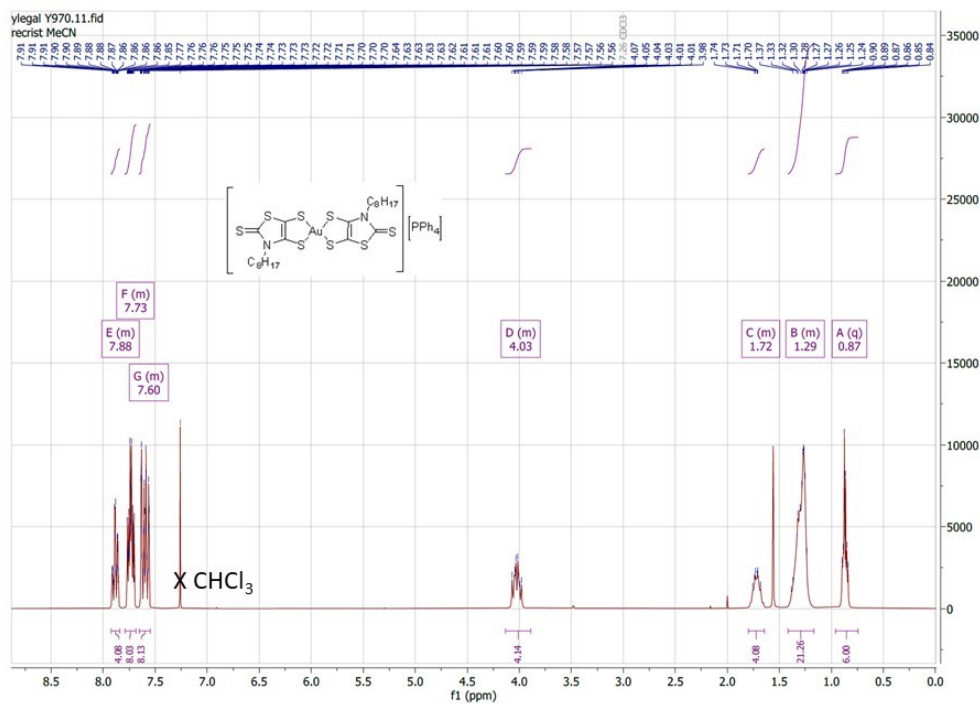

Fig. S15: <sup>1</sup>H NMR of AuN-C<sub>8</sub>

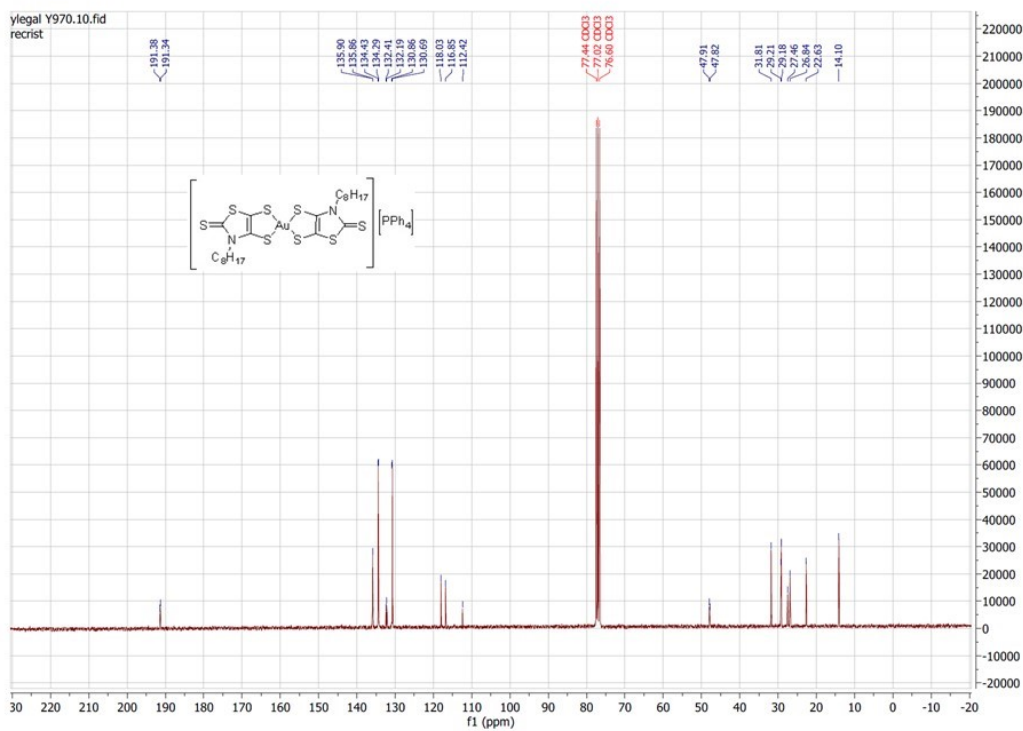

Fig. S16: <sup>13</sup>C NMR of AuN-C<sub>8</sub>

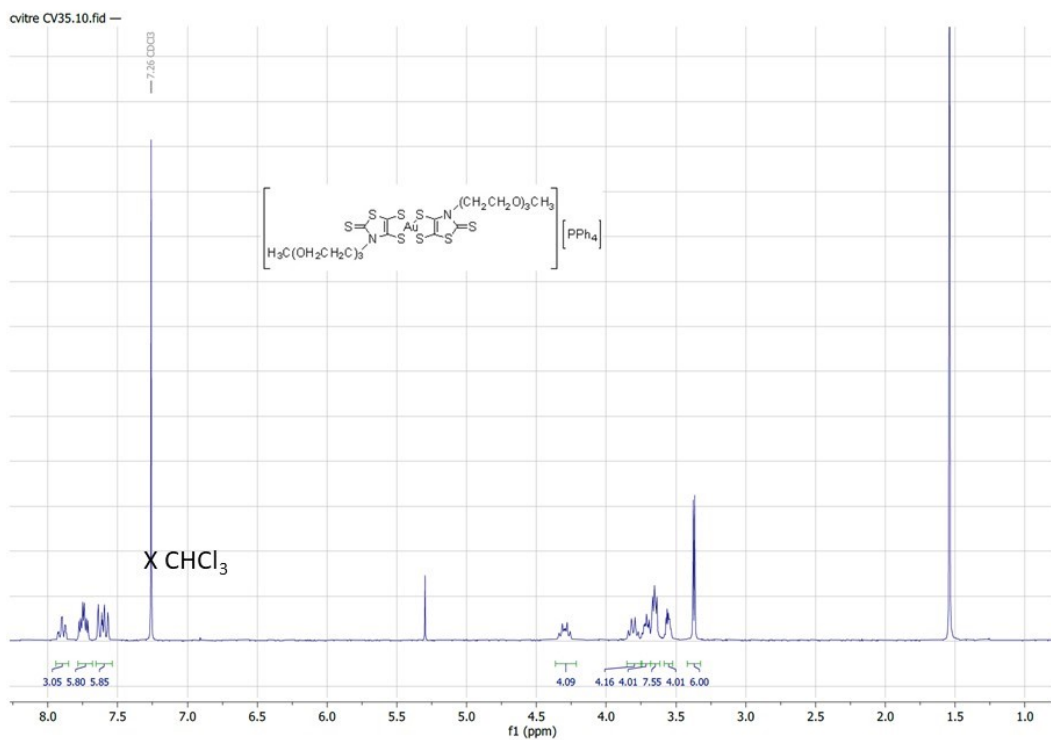

**Fig. S17:** <sup>1</sup>H NMR of AuN-PEG

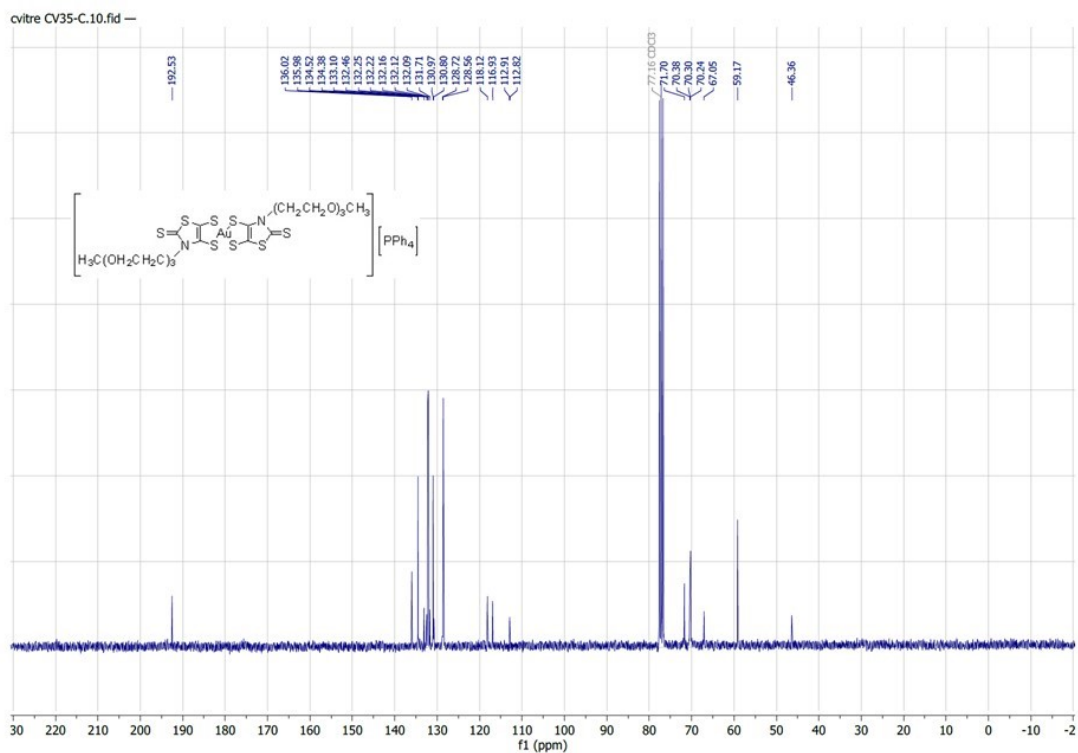

**Fig. S18:** <sup>13</sup>C NMR of AuN-PEG

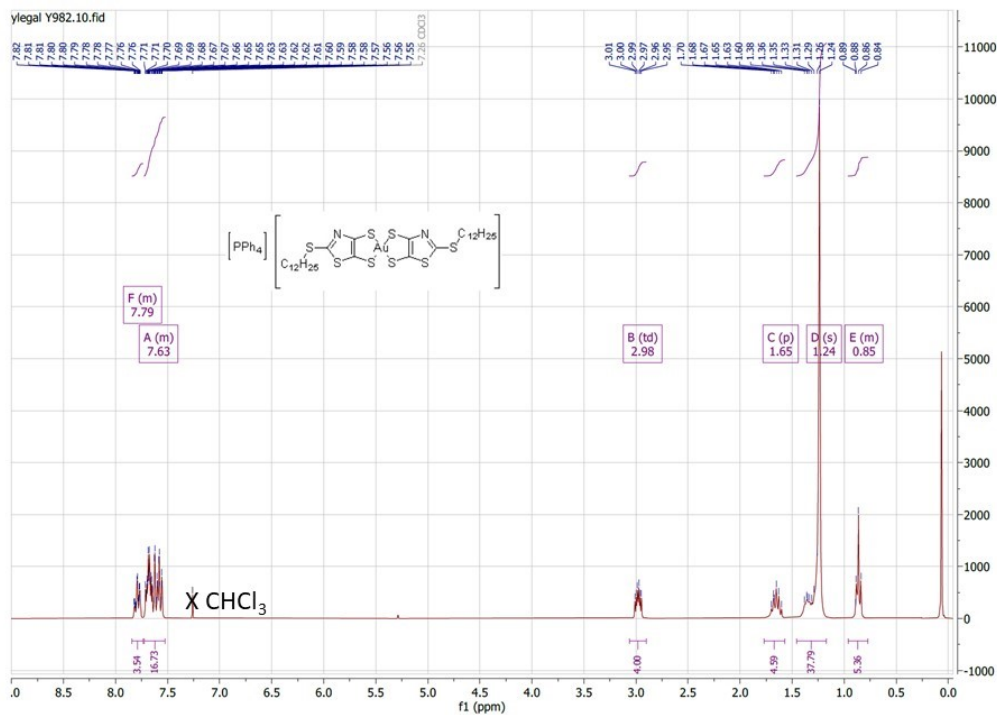

Fig. S19:  $^1\text{H}$  NMR of AuS- C<sub>12</sub>

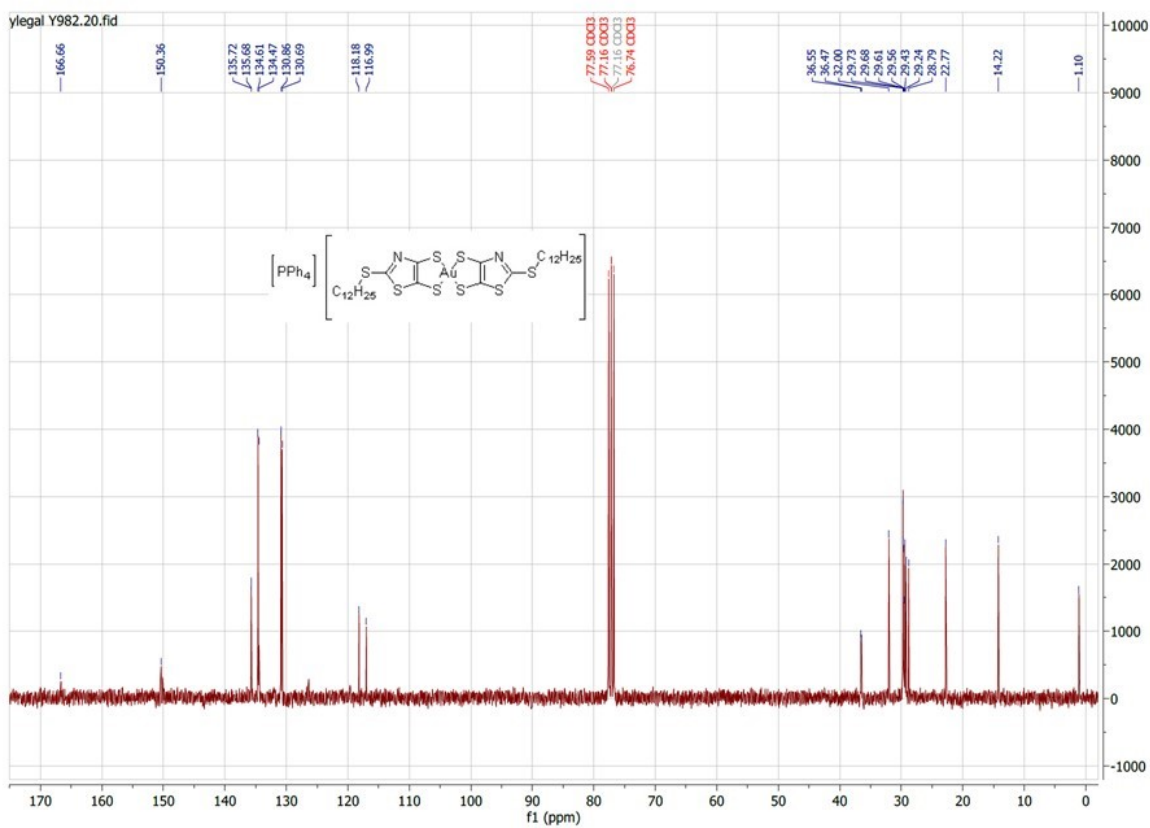

Fig. S20:  $^{13}\text{C}$  NMR of AuS-C<sub>12</sub>

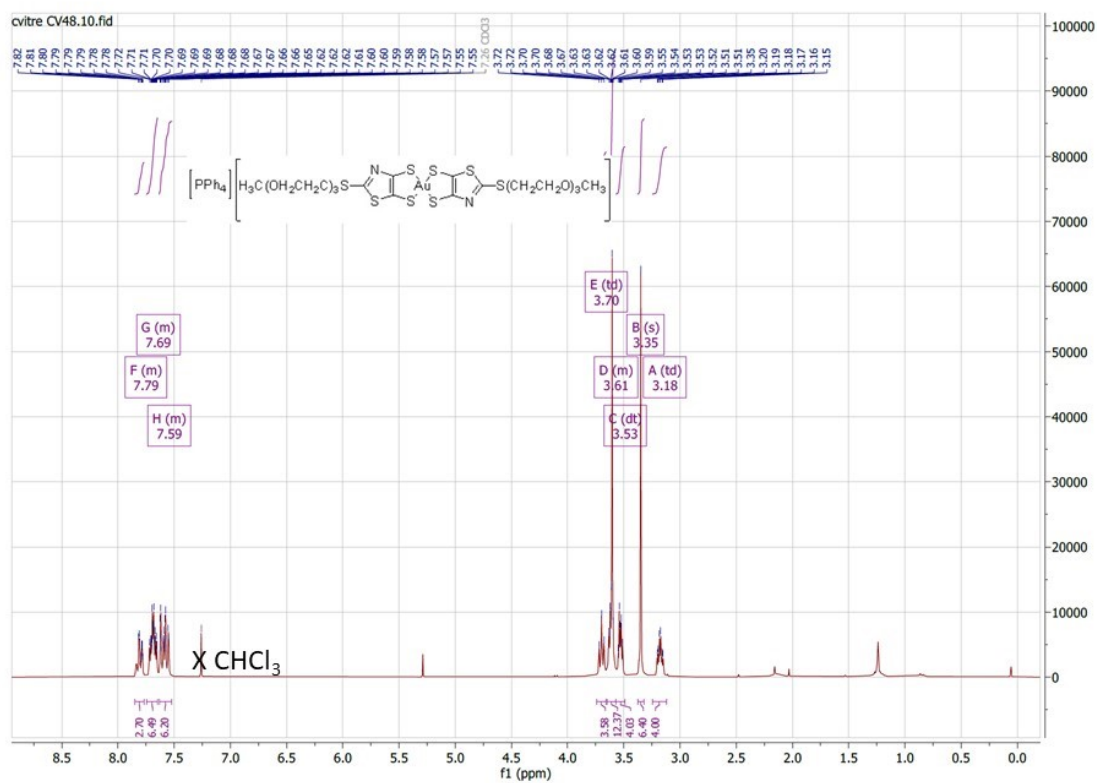

Fig. S21:  $^1H$  NMR of AuS-PEG

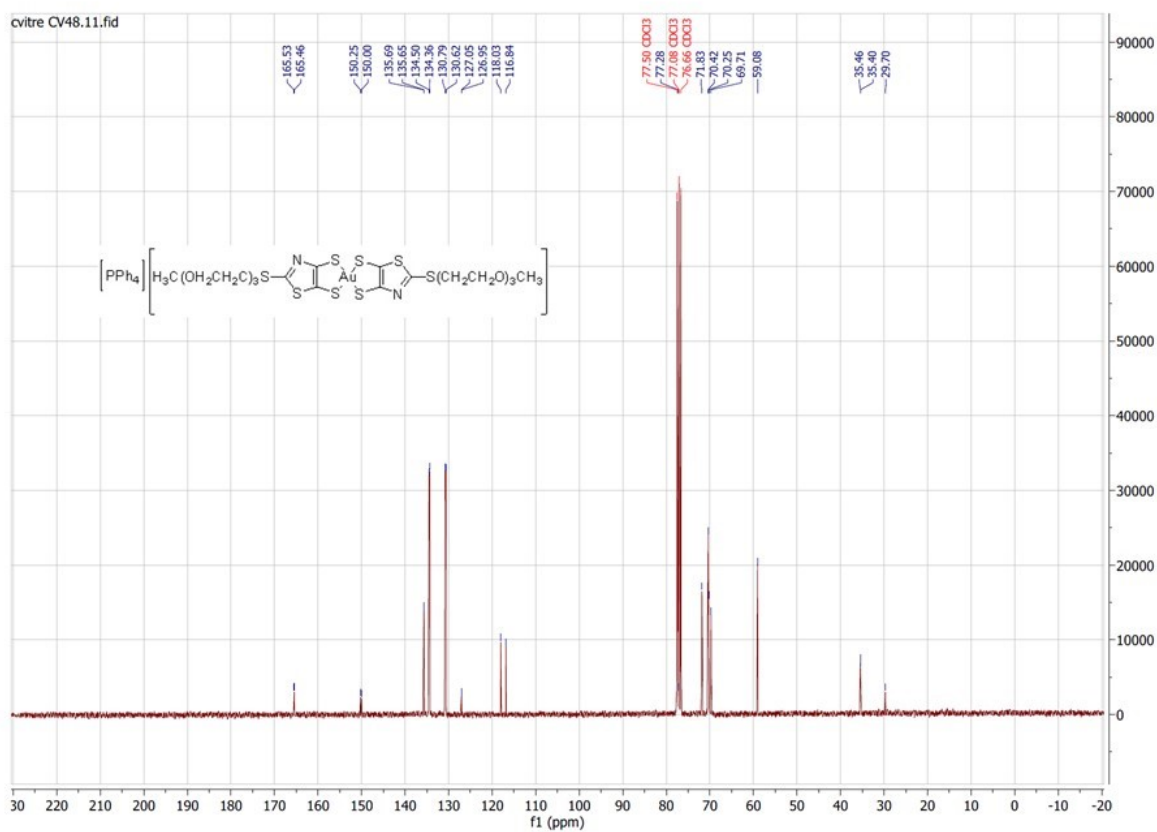

Fig. S22:  $^{13}C$  NMR of AuS-PEG

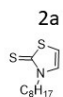

Centre régional de mesures physiques de l'Ouest (CRMPO) - RAPPORT D'ANALYSE

**Analysis Info**  
 Analysis Name D:\Data\CRMPO\ASAP\_12635\_MS\_01.d  
 Method ASAP\_CRMPO\_tune\_low.m  
 Sample Name Y 966  
 Comment Y. LE GAL Y 966 Température : 70°C

Acquisition Date 9/10/2021 10:17:49 AM  
 Operator Fabian LAMBERT  
 Instrument maXis

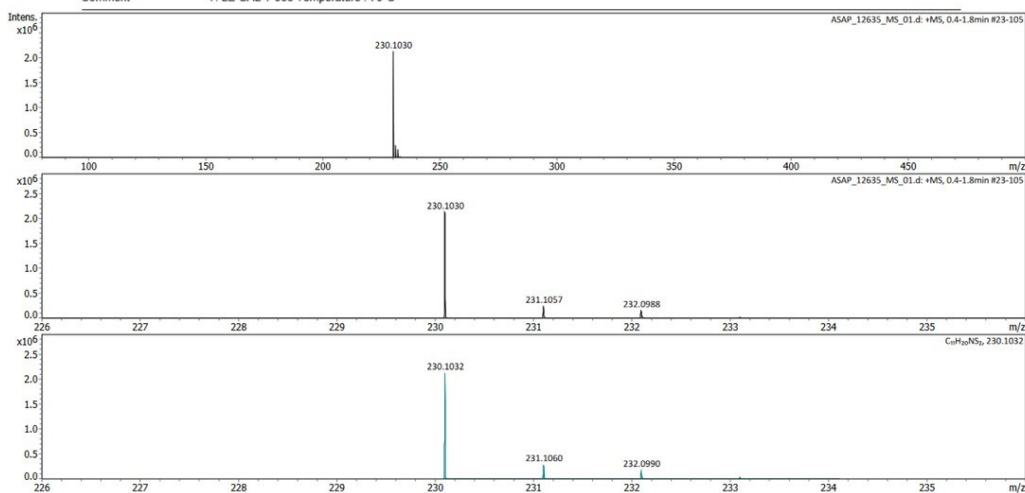

Fig. S23: HRMS of 2a

2b

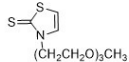

Centre régional de mesures physiques de l'Ouest (CRMPO) - RAPPORT D'ANALYSE

**Analysis Info**  
 Analysis Name D:\Data\CRMPO\ESI\_13456\_MS\_01.d  
 Method CRMPO\_tune\_low.m  
 Sample Name CV 28  
 Comment Y. LE GAL CV 28 Solvant : CH3OH/CH2Cl2 (90/10)

Acquisition Date 5/2/2022 2:36:24 PM  
 Operator Fabian LAMBERT  
 Instrument maXis

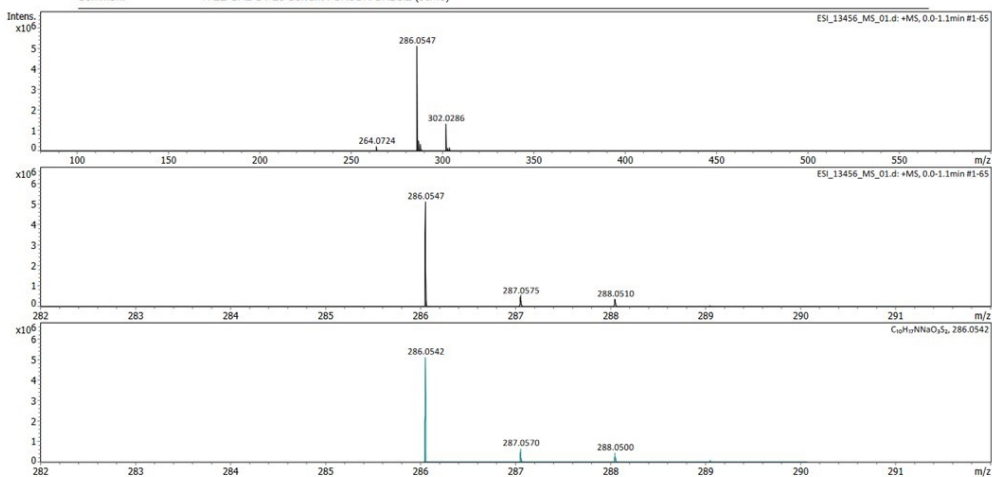

Fig. S24: HRMS of 2b

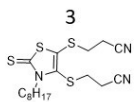

Centre régional de mesures physiques de l'Ouest (CRMPO) - RAPPORT D'ANALYSE

**Analysis Info**  
 Analysis Name: D:\Data\CRMPO\ESI\_12501\_MS\_01.d  
 Method: CRMPO\_tune\_low.m  
 Sample Name: Y 968  
 Comment: Y. LE GAL Y 968 Solvant : CH3OH/CH2Cl2 (90/10)

Acquisition Date: 6/29/2021 3:19:40 PM  
 Operator: Fabian LAMBERT  
 Instrument: maXis

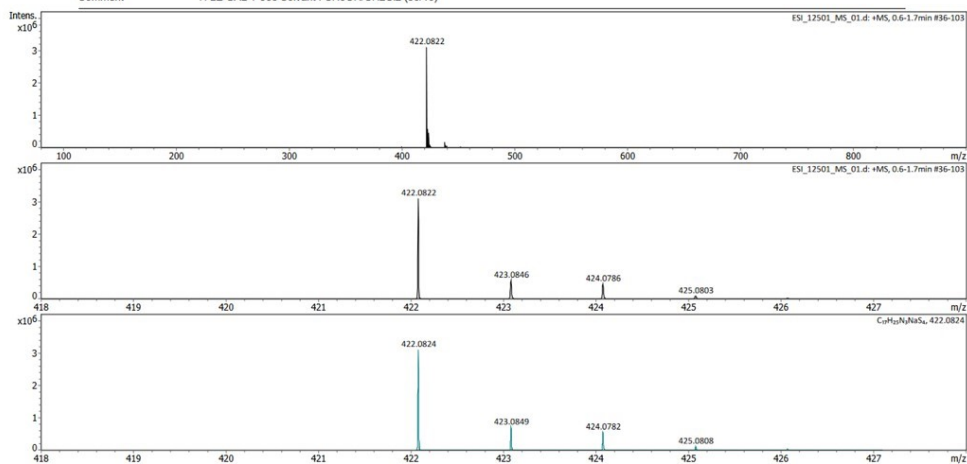

Fig. S25: HRMS of 3

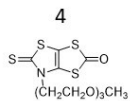

Centre régional de mesures physiques de l'Ouest (CRMPO) - RAPPORT D'ANALYSE

**Analysis Info**  
 Analysis Name: D:\Data\CRMPO\ASAP\_13571\_MS\_01.d  
 Method: ASAP\_CRMPO\_tune\_low.m  
 Sample Name: CV 32  
 Comment: Y. LE GAL CV 32 Température : 120°C

Acquisition Date: 6/27/2022 2:19:17 PM  
 Operator: Fabian LAMBERT  
 Instrument: maXis

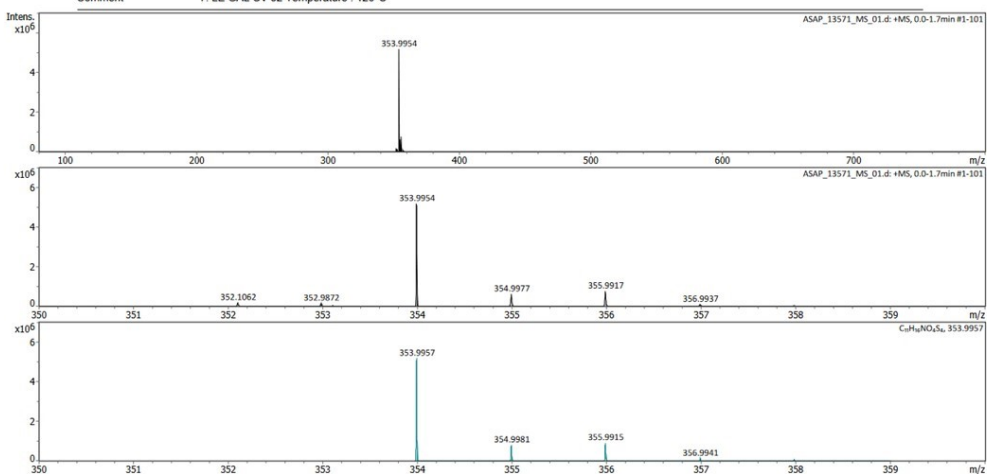

Fig. S26: HRMS of 4

6a

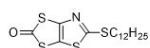

## Centre régional de mesures physiques de l'Ouest (CRMPO) - RAPPORT D'ANALYSE

**Analysis Info**  
 Analysis Name D:\Data\CRMPO\ESI\_12502\_MS\_01.d  
 Method CRMPO\_tune\_low.m  
 Sample Name Y 969  
 Comment Y. LE GAL Y 969 Solvant : CH3OH/CH2Cl2 (90/10)

Acquisition Date 6/29/2021 4:21:52 PM  
 Operator Fabian LAMBERT  
 Instrument maXis

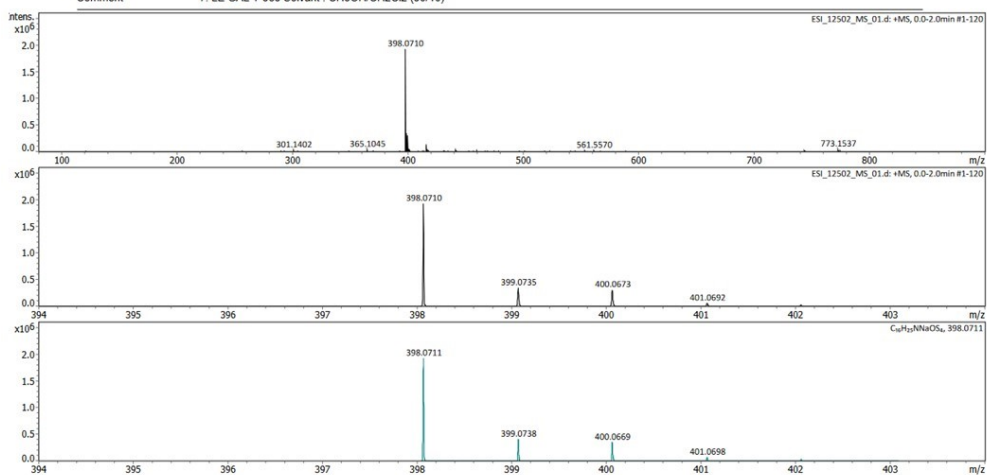

Fig. S27: HRMS of 6a

6b

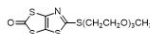

## Centre régional de mesures physiques de l'Ouest (CRMPO) - RAPPORT D'ANALYSE

**Analysis Info**  
 Analysis Name D:\Data\CRMPO\ASAP\_13573\_MS\_01.d  
 Method ASAP\_CRMPO\_tune\_low.m  
 Sample Name CV 43  
 Comment Y. LE GAL CV 43 Température : 100°C

Acquisition Date 6/27/2022 2:52:41 PM  
 Operator Fabian LAMBERT  
 Instrument maXis

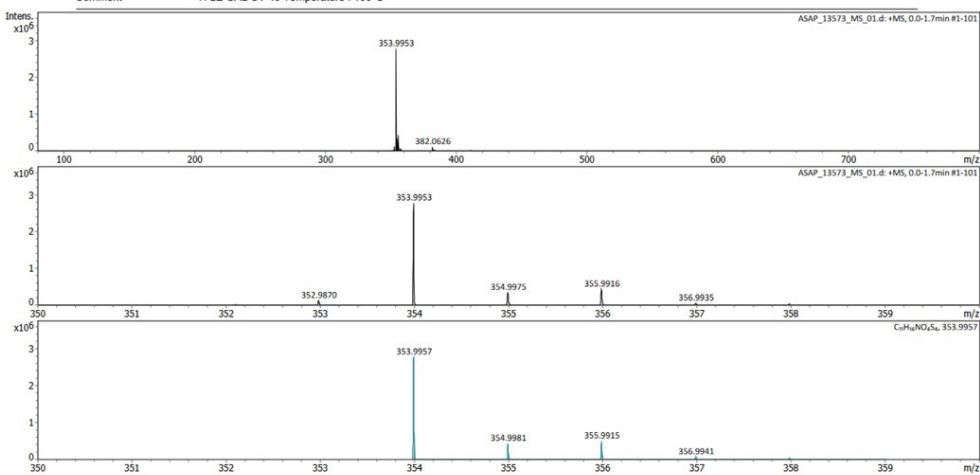

Fig. S28: HRMS of 6b

CRMPO  
Y. LE GAL Y 970 PJ Solvant : CH2Cl2  
C:\XcaliburData\CRMPO\ESI\_12636\_MS\_03

Rapport d'analyse  
09/15/21 15:54:09

Thermo Scientific Q-Exactive

ESI\_12636\_MS\_03 #1-230 RT: 0.01-2.01 AV: 230 NL: 7.68E9  
T: FTMS - p ESI Full lock ms [150.0000-2250.0000]

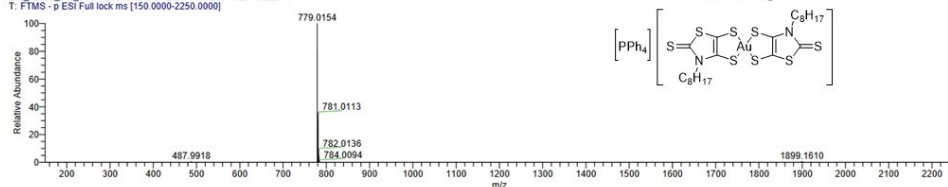

ESI\_12636\_MS\_03 #1-230 RT: 0.01-2.01 AV: 230 NL: 3.77E7  
T: FTMS - p ESI Full lock ms [150.0000-2250.0000]

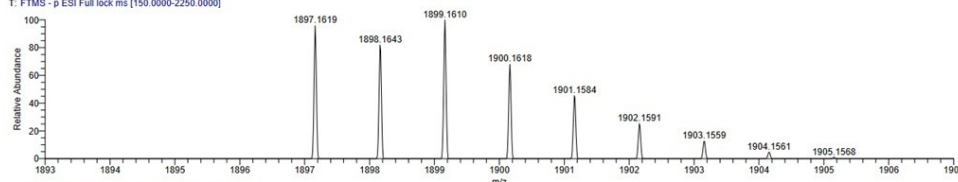

(C22H34N2S8Au)2(C24H20P) Au2 S16 N4 H88 C68 P1 p(g.s.)

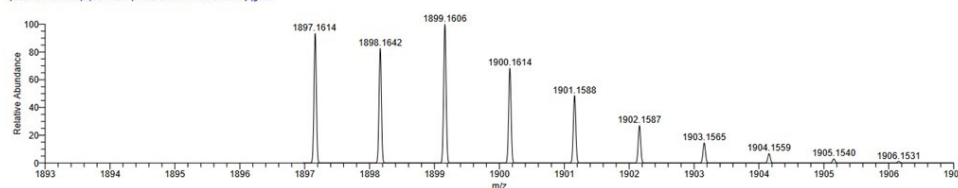

Fig. S29: HRMS of AuN-C<sub>8</sub>

CRMPO  
Y. LE GAL CV 35 PJ Solvant : CH2Cl2  
C:\XcaliburData\CRMPO\ESI\_13572\_MS\_03

Rapport d'analyse  
06/10/22 18:00:32

Thermo Scientific Q-Exactive

ESI\_13572\_MS\_03 #1-230 RT: 0.01-2.01 AV: 230 NL: 8.13E9  
T: FTMS - p ESI Full lock ms [150.0000-2250.0000]

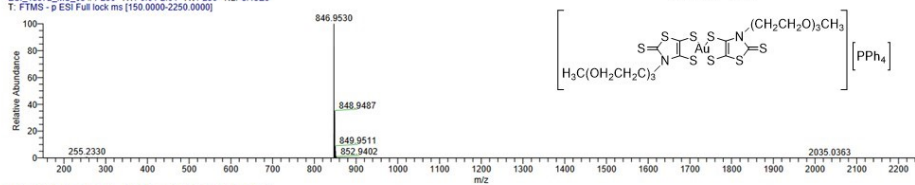

ESI\_13572\_MS\_03 #1-230 RT: 0.01-2.01 AV: 230 NL: 7.46E6  
T: FTMS - p ESI Full lock ms [150.0000-2250.0000]

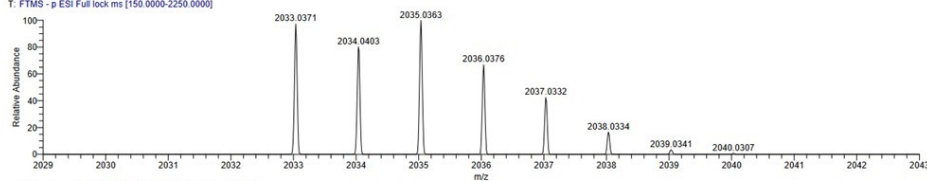

(C20H30N2O6S8Au)2(C24H20P) Au2 S16 O12 N4 H80 C64 P1

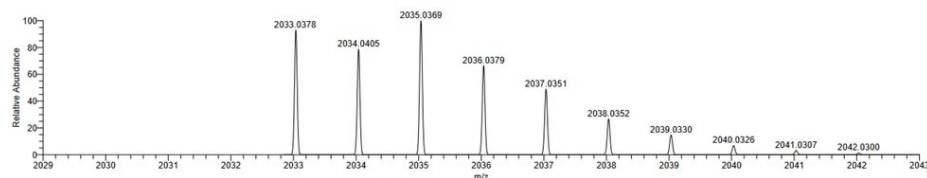

Fig. S30: HRMS of AuN-PEG



CRMPO  
Y. LE GAL Y 971 PJ Solvant : CH2Cl2  
C:\Xcalibur\Data\CRMPO\ESI\_12637\_MS\_02

Rapport d'analyse  
09/15/21 17:08:19

Thermo Scientific Q-Exactive

ESI\_12637\_MS\_02 #1-230 RT: 0.01-2.01 AV: 230 NL: 4.96E9  
T: FTMS - p ESI Full lock ms [150.0000-2250.0000]

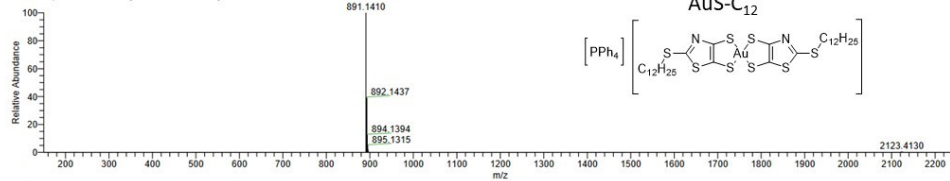

ESI\_12637\_MS\_02 #1-230 RT: 0.01-2.01 AV: 230 NL: 2.02E7  
T: FTMS - p ESI Full lock ms [150.0000-2250.0000]

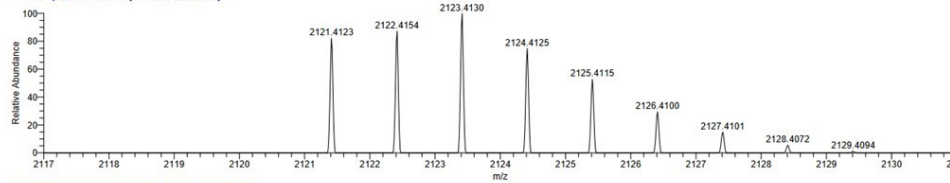

(C30H50N2S8Au)2(C24H20P): Au2 S16 N4 H120 C84 P1 p/g...

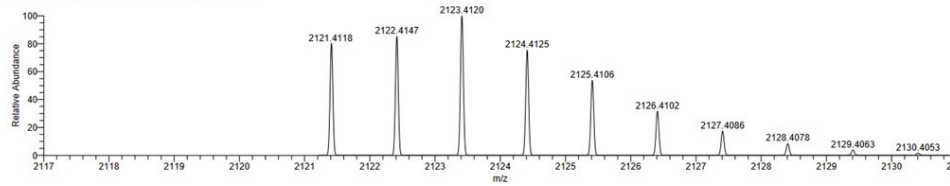

Fig. S31: HRMS of AuS-C<sub>12</sub>

CRMPO  
Y. LE GAL CV 48 PJ Solvant : CH2Cl2  
C:\Xcalibur\Data\CRMPO\ESI\_13826\_MS\_03

Rapport d'analyse  
10/11/22 19:31:34

Thermo Scientific Q-Exactive

ESI\_13826\_MS\_03 #1-230 RT: 0.01-2.01 AV: 230 NL: 7.75E9  
T: FTMS - p ESI Full ms [150.0000-2250.0000]

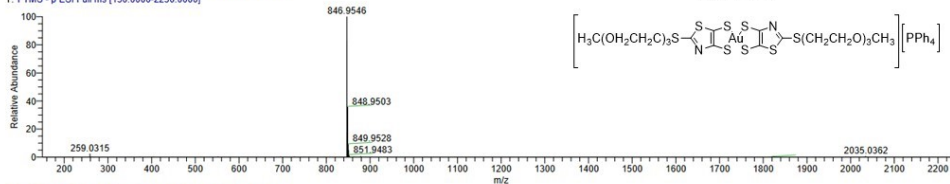

ESI\_13826\_MS\_03 #1-230 RT: 0.01-2.01 AV: 230 NL: 2.84E7  
T: FTMS - p ESI Full ms [150.0000-2250.0000]

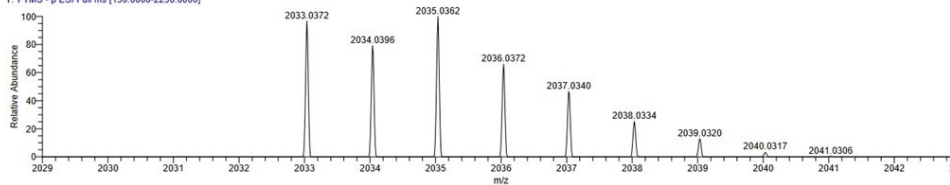

(C20H30N2O6S8Au)2(C24H20P): Au2 S16 O12 N4 H80 C84 P1...

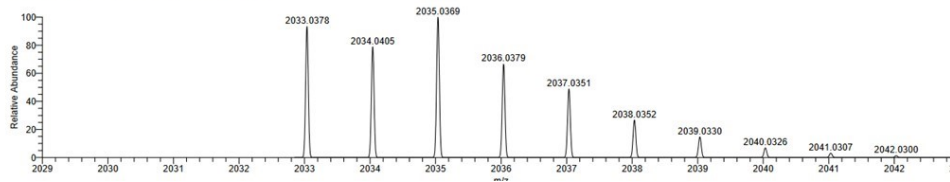

Fig. S32: HRMS of AuS-PEG

**Table S1.** Redox potentials (E in V vs. SCE) and absorption maxima  $\lambda_{\text{max}}$  (nm) for the NIR absorptions of the investigated monoanionic gold complexes.

|                                 | $E_{\text{pc}}^1$ | $E_{\text{pa/pc}}^2$   | $E_{\text{pa/pc}}^3$   | $\lambda_{\text{max}}$ (nm) |            |
|---------------------------------|-------------------|------------------------|------------------------|-----------------------------|------------|
|                                 |                   |                        |                        | Neutral                     | Monocation |
| AuN-C <sub>8</sub>              | -1.10*            | 0.54/0.49              | 0.77/0.59              | 2080                        | -          |
| AuN-PEG                         | -0.94*            | 0.54/0.53 <sup>a</sup> | 0.68/0.58 <sup>a</sup> | 2030                        | -          |
| AuN-Et                          | -0.90*            | 0.55/0.49 <sup>a</sup> | 0.71/0.61 <sup>a</sup> | -                           | -          |
| AuN-EtOH                        | -0.99*            | 0.47/0.35 <sup>a</sup> | 0.67/0.46 <sup>a</sup> | -                           | -          |
| AuS-C <sub>12</sub>             | -1.01*            | 0.51/0.36              | 1.10/0.91              | 1734                        | 1030       |
| AuS-PEG                         | -1.10*            | 0.52/0.46              | 1.00/0.93              | 1700                        | 1050       |
| AuS-Et                          | -1.04*            | 0.48/0.44 <sup>a</sup> | -                      | -                           | -          |
| AuS-EtOH                        | -1.12*            | 0.45/0.28 <sup>a</sup> | -                      | -                           | -          |
| AuS- <i>t</i> BuS <sup>13</sup> | -1.18*            | 0.58/0.42              | 1.05/0.98              | 1614                        | 1038       |

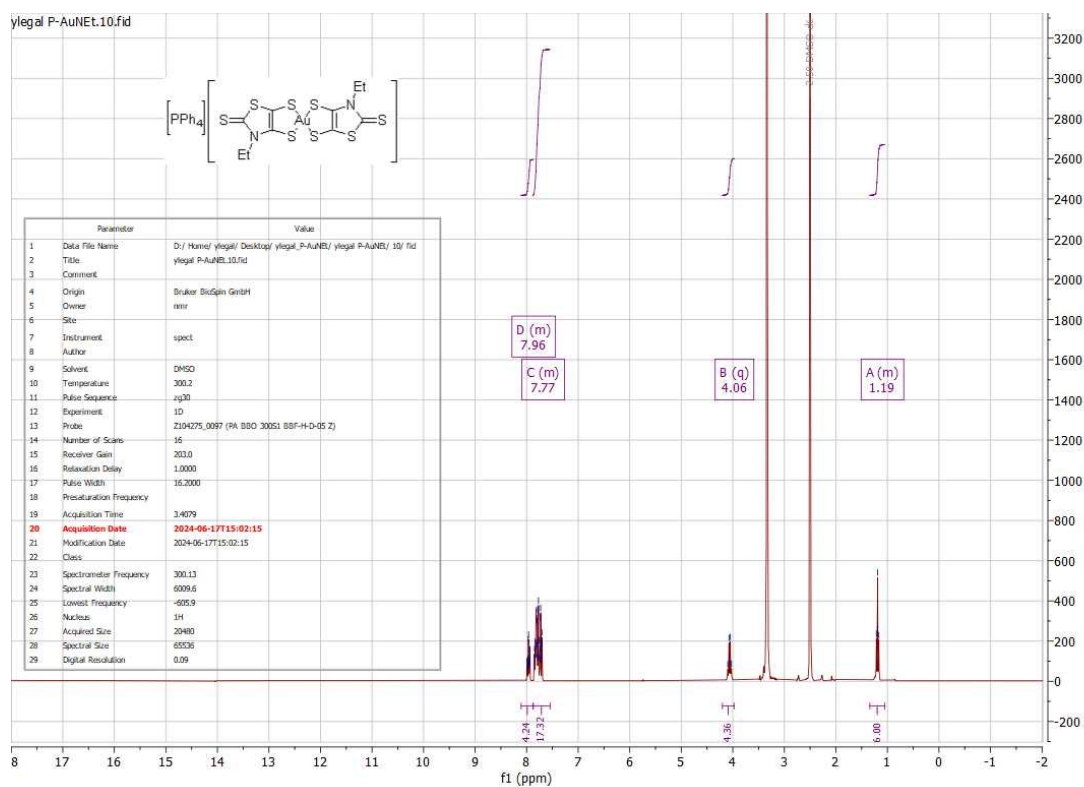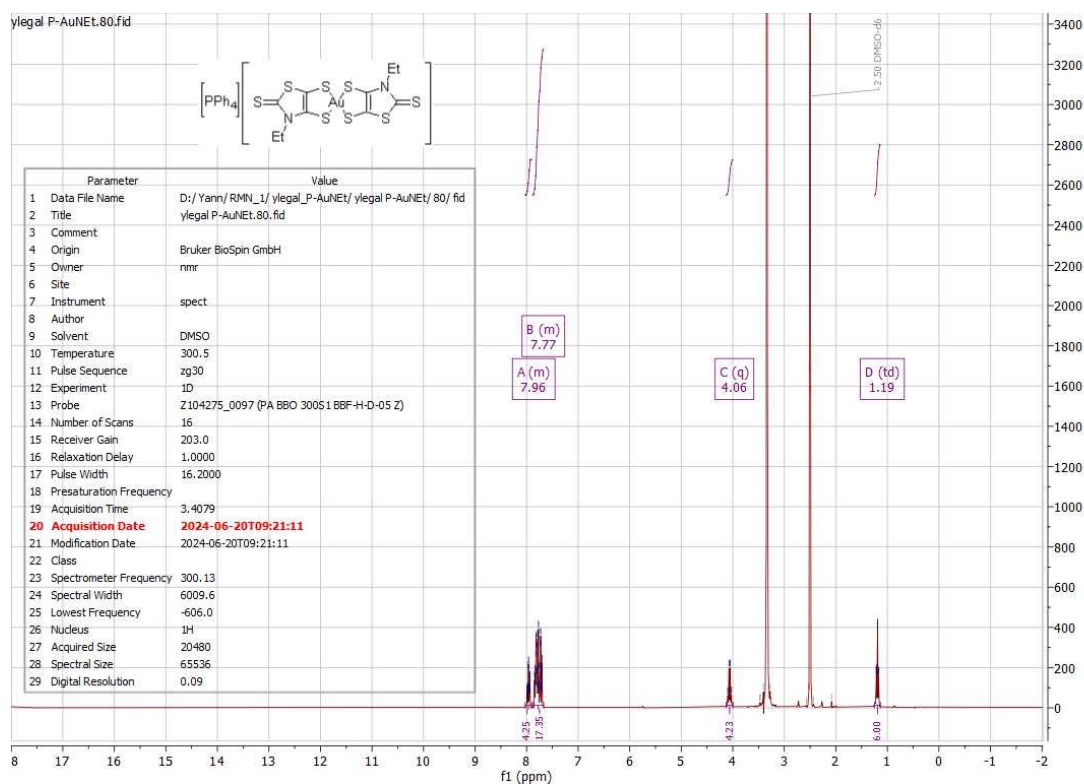

**Figure S33** -  $^1\text{H}$ NMR spectra of complex AuN-Et in DMSO solution at T0 (top) and the same tube analyzed 66h later (bottom).
